# Supplementary material
Source: PubMed Central journal article supplement (PMC6538428)
Supplement: NIHMS1527013-supplement-Supplemental_Material.pdf [file NIHMS1527013-supplement-Supplemental_Material.pdf]

**SUPPLEMENTAL MATERIAL**

Ethnic Differences in 90-day Post-Stroke Medication Adherence

**Table I. Characteristics of Included compared to Excluded Patients, by Ethnicity**

|                          | NHW         |              |             |              |        | MA          |              |             |              |        |
|--------------------------|-------------|--------------|-------------|--------------|--------|-------------|--------------|-------------|--------------|--------|
|                          | Excluded    |              | Included    |              | P      | Excluded    |              | Included    |              | P      |
|                          | N or Median | % or (Q1,Q3) | N or Median | % or (Q1,Q3) |        | N or Median | % or (Q1,Q3) | N or Median | % or (Q1,Q3) |        |
| Female                   | 264         | 49.9         | 207         | 49.1         | 0.79   | 315         | 49.0         | 353         | 51.0         | 0.46   |
| Total Insured            | 482         | 91.1         | 384         | 91.0         | 0.97   | 566         | 88.0         | 616         | 89.0         | 0.57   |
| Atrial Fibrillation      | 129         | 24.4         | 69          | 16.4         | <0.01  | 69          | 10.7         | 71          | 10.3         | 0.75   |
| High Cholesterol         | 227         | 43.0         | 220         | 52.1         | <0.01  | 302         | 47.0         | 357         | 51.6         | 0.11   |
| Diabetes                 | 179         | 33.8         | 130         | 30.8         | 0.30   | 374         | 58.2         | 401         | 58.0         | 0.91   |
| Hypertension             | 417         | 78.8         | 310         | 73.5         | <0.05  | 535         | 83.2         | 593         | 85.7         | 0.21   |
| History of Stroke or TIA | 148         | 28.0         | 108         | 25.6         | 0.40   | 174         | 27.1         | 189         | 27.3         | 0.95   |
| Current/Former Smoker    | 232         | 43.9         | 194         | 46.0         | 0.53   | 215         | 33.4         | 255         | 36.9         | 0.22   |
| Excessive Alcohol use    | 45          | 8.5          | 36          | 8.5          | 0.99   | 51          | 7.9          | 48          | 6.9          | 0.47   |
| Treated with tPA         | 57          | 10.8         | 61          | 14.5         | 0.09   | 62          | 9.6          | 75          | 10.8         | 0.48   |
| Age                      | 73          | (61,83)      | 68          | (60,79)      | <0.001 | 68          | (58,80)      | 65          | (57, 75)     | <0.001 |
| NIHSS                    | 4           | (1,9)        | 3           | (1,6)        | <0.01  | 4           | (1,8)        | 3           | (1,7)        | <0.05  |
| Comorbidity Index        | 3           | (2,5)        | 3           | (2,5)        | <0.05  | 3           | (2,5)        | 3           | (2,5)        | 0.88   |

TIA=transient ischemic attack, NIHSS=National Institute of Health Stroke Scale, MA=Mexican American, NHW=Non-Hispanic White

**Table II. Association of nonadherence and number of drug classes**

| Number of Medication<br>Classes | N<br>total | N Non-<br>adherent | OR   | 95% CI |      |
|---------------------------------|------------|--------------------|------|--------|------|
| 1 (ref)                         | 99         | 27                 |      |        |      |
| 2 (v 1)                         | 288        | 79                 | 1.01 | 0.6    | 1.68 |
| 3 (v 1)                         | 578        | 135                | 0.81 | 0.5    | 1.32 |
| 4 (v 1)                         | 137        | 32                 | 0.81 | 0.5    | 1.47 |
| 5 (v 1)                         | 12         | 2                  | 0.53 | 0.11   | 2.59 |

Modeled using logistic regression

**Table III. Association of nonadherence and number of medications**

| Number of medications                 | N    | N Non-adherent | OR   | 95% CI |      |
|---------------------------------------|------|----------------|------|--------|------|
| 1 (ref)                               | 66   | 20             |      |        |      |
| 2 (vs 1)                              | 148  | 43             | 0.94 | 0.5    | 1.78 |
| 3 (vs 1)                              | 273  | 71             | 0.81 | 0.45   | 1.46 |
| 4 (vs 1)                              | 262  | 55             | 0.61 | 0.33   | 1.12 |
| ≥5 (vs 1)                             | 365  | 86             | 0.71 | 0.4    | 1.26 |
| Number of Medications<br>(Continuous) | 1114 | 275            | 0.93 | 0.85   | 1.01 |

Modeled using logistic regression

**Table IV. Sensitivity Analysis for Number of Medications**

|                                                    | Antiplatelets<br>(n=914) | Anticoagulants<br>(n=173) | Antihypertensives<br>(n=917) | Statins<br>(n=819)   | Antidepressants<br>(n=177) |
|----------------------------------------------------|--------------------------|---------------------------|------------------------------|----------------------|----------------------------|
|                                                    | OR<br>(95% CI)           | OR<br>(95% CI)            | OR<br>(95% CI)               | OR<br>(95% CI)       | OR<br>(95% CI)             |
| MA(v NHW)                                          | 0.93<br>(0.64, 1.34)     | 1.04<br>(0.39, 2.78)      | 1.00<br>(0.67, 1.49)         | 1.15<br>(0.76, 1.74) | 1.19<br>(0.44, 3.22)       |
| Age                                                | 0.98<br>(0.96, 1.00)     | 0.98<br>(0.94, 1.02)      | 0.97<br>(0.95, 0.99)         | 0.98<br>(0.96, 1.00) | 0.97<br>(0.93, 1.02)       |
| Female<br>(v Male)                                 | 0.84<br>(0.60, 1.16)     | 1.06<br>(0.44, 2.53)      | 0.94<br>(0.66, 1.33)         | 1.07<br>(0.74, 1.54) | 1.01<br>(0.39, 2.62)       |
| NIHSS                                              | 0.99<br>(0.95, 1.03)     | 0.93<br>(0.85, 1.02)      | 0.98<br>(0.94, 1.02)         | 0.97<br>(0.93, 1.01) | 1.00<br>(0.92, 1.08)       |
| Private and<br>Medicare<br>(v non and<br>Medicaid) | 0.65<br>(0.41, 1.04)     | 0.97<br>(0.20, 4.68)      | 0.75<br>(0.45, 1.23)         | 0.60<br>(0.36, 1.00) | 0.26<br>(0.08, 0.84)       |
| HS education                                       | 1.00<br>(0.60, 1.69)     | 1.54<br>(0.35, 6.77)      | 1.18<br>(0.69, 2.03)         | 1.28<br>(0.73, 2.27) | 1.49<br>(0.27, 8.16)       |
| Vocational/<br>some college                        | 0.96<br>(0.53, 1.71)     | 1.38<br>(0.27, 6.94)      | 0.74<br>(0.39, 1.40)         | 0.78<br>(0.40, 1.53) | 1.01<br>(0.15, 6.74)       |
| College or<br>more                                 | 0.72<br>(0.36, 1.43)     | 1.48<br>(0.23, 9.69)      | 0.76<br>(0.36, 1.61)         | 0.81<br>(0.37, 1.78) | 0.74<br>(0.08, 7.12)       |
| Number of<br>drugs<br>(continuous)                 | 0.84<br>(0.76, 0.94)     | 1.19<br>(0.92, 1.53)      | 0.90<br>(0.79, 1.02)         | 0.97<br>(0.86, 1.10) | 1.02<br>(0.76, 1.37)       |

MA=Mexican American, NHW=Non-Hispanic White, NIHSS=National Institute of Health Stroke Scale, HS= High school

No high school is the reference category for education

Adherence defined as never missing a dose

Estimates obtained from a logistic regression

**Table V. Prevalence of Non-adherence by Medication Class – Alternate Adherence Definition**

|                   | Overall |        |      | MA  |        |      | NHW |        |      |
|-------------------|---------|--------|------|-----|--------|------|-----|--------|------|
|                   | N       | Missed | %    | N   | Missed | %    | N   | Missed | %    |
| Antiplatelets     | 914     | 104    | 11.4 | 574 | 67     | 11.7 | 340 | 37     | 10.9 |
| Anticoagulants    | 173     | 9      | 5.2  | 82  | 4      | 4.9  | 91  | 5      | 5.5  |
| Antihypertensives | 917     | 69     | 7.5  | 585 | 50     | 8.6  | 332 | 19     | 5.7  |
| Statins           | 819     | 63     | 7.7  | 504 | 45     | 9.1  | 315 | 17     | 5.4  |
| Antidepressants   | 177     | 14     | 7.9  | 105 | 11     | 10.5 | 72  | 3      | 4.2  |

MA=Mexican Americans, NHW=Non-Hispanic Whites, Missed=non-adherent. Adherence defined as never or rarely missing a dose.
